# Supplementary material for: Screening novel candidates for mid-IR nonlinear optical materials from I3–V–VI4compounds
Source: Royal Society of Chemistry journal article supplement (doi:10.1039/c6tc05510a), 2017-01-01
Supplement: c6tc05510a1.pdf [file c6tc05510a1.pdf]

**Supporting Information for**  
**“Screening novel candidates for mid-IR nonlinear optical**  
**materials from I<sub>3</sub>-V-VI<sub>4</sub> compounds”**

Zuju Ma,<sup>1</sup> Jinyu Hu,<sup>1</sup> Rongjian Sa,<sup>1</sup> Qiaohong Li<sup>1</sup>, Yongfan Zhang<sup>2</sup> and Kechen Wu<sup>1,a)</sup>

<sup>1</sup> *State Key Laboratory of Structural Chemistry, Fujian Institute of Research on the  
Structure of Matter, Chinese Academy of Sciences, Fuzhou 350002, China*

<sup>2</sup> *Department of Chemistry, Fuzhou University, Fuzhou 350002, P. R. China*

---

<sup>a)</sup> Author to whom correspondence should be addressed. Electronic mail: [wkc@fjirsm.ac.cn](mailto:wkc@fjirsm.ac.cn).

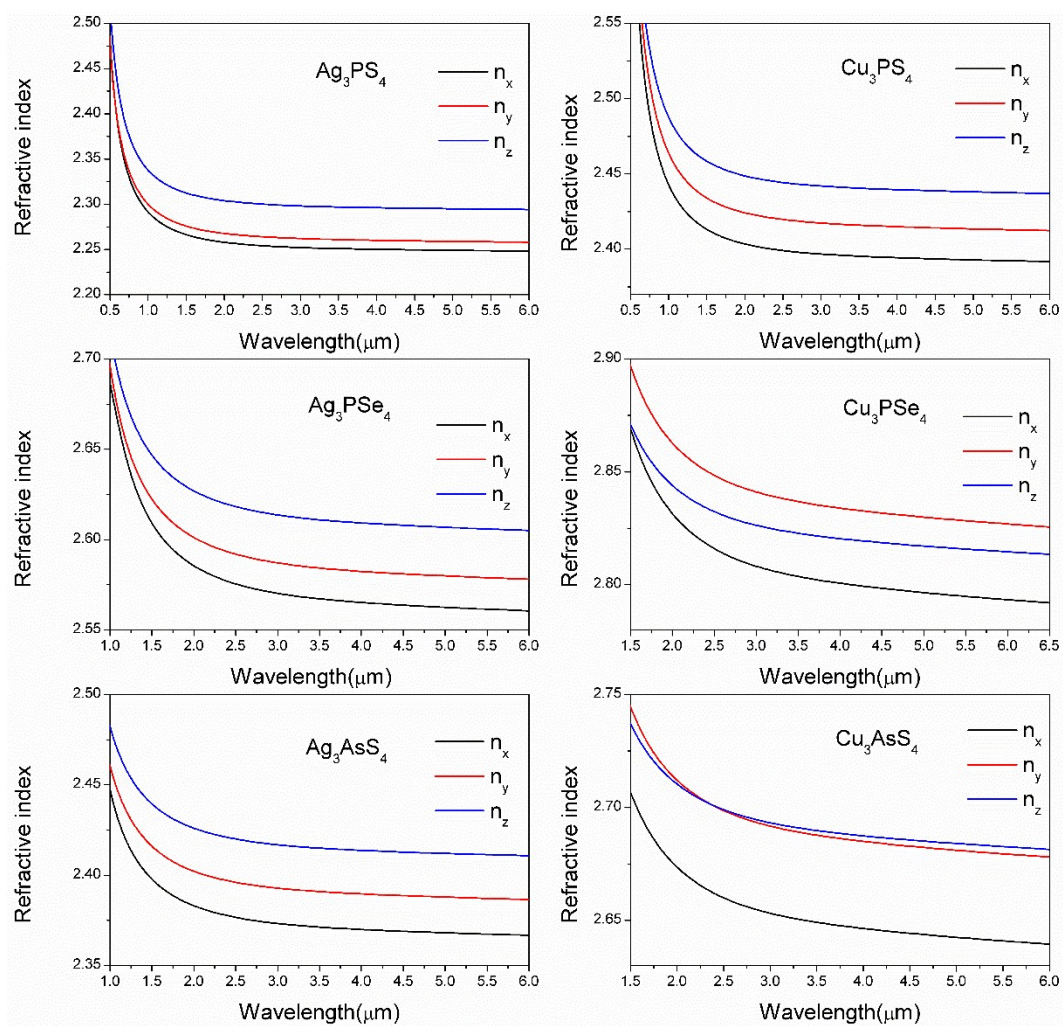

**Figure S1.** The calculated dispersion curves of refractive indices in  $\text{I}_3\text{-V-VI}_4$  compounds (with  $\text{I} = \text{Ag}$  or  $\text{Cu}$ ,  $\text{V} = \text{P}$  or  $\text{As}$ , and  $\text{VI} = \text{S}$  or  $\text{Se}$ ) by the hybrid HSE06 functional.
